# Supplementary material for: The effects of partially or fully linked boron with a cross-linking structure of an organic precursor on the purity and morphology of ZrB2 powder
Source: Royal Society of Chemistry journal article supplement (doi:10.1039/d3ra06932j), 2024-01-01
Supplement: d3ra06932j1.pdf [file d3ra06932j1.pdf]

## Supplementary material

### The effects of boron partially or fully linked with a cross-linking structure of organic precursor on purity and morphology of ZrB<sub>2</sub> powder

Xi Yang<sup>a</sup>, Weijian Han<sup>b,\*</sup>, Tong Zhao<sup>b,\*</sup>, Ruixing Li<sup>a,\*</sup>

<sup>a</sup> *Key Laboratory of Aerospace Materials and Performance (Ministry of Education), School of Materials Science and Engineering, Beihang University, Beijing 100191, China*

<sup>b</sup> *Key Laboratory of Science and Technology on High-tech Polymer Materials, Institute of Chemistry, Chinese Academy of Sciences, Beijing 100190, China*

\*Corresponding author:

**Ruixing Li**, Ph.D.,

School of Materials Science and Engineering, Beihang University

Xueyuanlu No.37, School of materials science and engineering, Beijing 100191, China

TEL / FAX: 86-10-8231-6500

E-mail: 1499149583@qq.com

**Weijian Han** and **Tong Zhao**, Ph.D.,

Key Laboratory of Science and Technology on High-tech Polymer Materials, Institute of Chemistry,  
Chinese Academy of Sciences, Beijing 100190, PR China

TEL/ FAX: 86-10-6256-2750

E-mail: hanweijian@iccas.ac.cn (Weijian Han); tzhao@iccas.ac.cn (Tong Zhao)

The complex was dissolved in ethanol (25 mL), followed by the addition of phenolphthalein indicator. NaOH solution (0.1 mol/L) was added dropwise until the color changed (pink), and then glycerol was added before the second titration was carried out to reach a second color change (pink). The percentage content of free B-OH (D, mol%) in the complex was calculated by the volume of NaOH solution used in the second titration, and a range of analysis was conducted as shown in Table S1. In Table S1,  $K_i$  ( $i = 1, 2, 3, 4$ ) is defined as the summation of the evaluation index D from four levels for each factor. The range between the maximum and minimum K values in the column associated with the corresponding factor is specified as R. The larger the R value, the greater the relative importance of the corresponding factor.

**Table S1** Conditions and corresponding results of orthogonal experiments.

| No. | Factor A<br>Glycerol:H <sub>3</sub> BO <sub>3</sub><br>(mol.) | Factor B<br>Reaction<br>temperature (°C) | Factor C<br>Reaction<br>time (h) | Results (D)<br>Free B–OH (mol%) |
|-----|---------------------------------------------------------------|------------------------------------------|----------------------------------|---------------------------------|
| 1   | 1:0.67                                                        | 140                                      | 1                                | 23.71                           |
| 2   | 1:0.67                                                        | 160                                      | 1.5                              | 24.11                           |
| 3   | 1:0.67                                                        | 180                                      | 2                                | 22.96                           |
| 4   | 1:0.67                                                        | 200                                      | 2.5                              | 27.30                           |
| 5   | 1:1                                                           | 140                                      | 1.5                              | 11.92                           |
| 6   | 1:1                                                           | 160                                      | 1                                | 8.86                            |
| 7   | 1:1                                                           | 180                                      | 2.5                              | 13.88                           |
| 8   | 1:1                                                           | 200                                      | 2                                | 12.36                           |
| 9   | 1:1.5                                                         | 140                                      | 2                                | 2.97                            |
| 10  | 1:1.5                                                         | 160                                      | 2.5                              | 3.14                            |

|         |         |         |         |      |
|---------|---------|---------|---------|------|
| 11      | 1:1.5   | 180     | 1       | 2.21 |
| 12      | 1:1.5   | 200     | 1.5     | 3.24 |
| 13      | 1:2     | 140     | 2.5     | 0.57 |
| 14      | 1:2     | 160     | 2       | 0.51 |
| 15      | 1:2     | 180     | 1.5     | 0.79 |
| 16      | 1:2     | 200     | 1       | 0.42 |
| <hr/>   |         |         |         |      |
| K1      | 98.08 % | 39.18 % | 35.22 % |      |
| K2      | 47.04 % | 36.62 % | 40.06 % |      |
| K3      | 11.57 % | 39.86 % | 38.80 % |      |
| K4      | 2.30 %  | 43.33 % | 44.90 % |      |
| <hr/>   |         |         |         |      |
| Range R | 95.78 % | 6.71 %  | 9.68 %  |      |

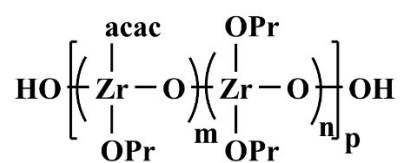

Fig. S1 Structure of PNZ.

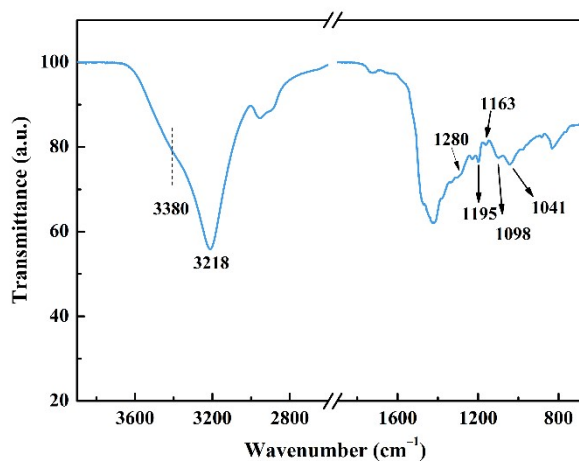

Fig. S2 FTIR spectrum of Precursor 3.

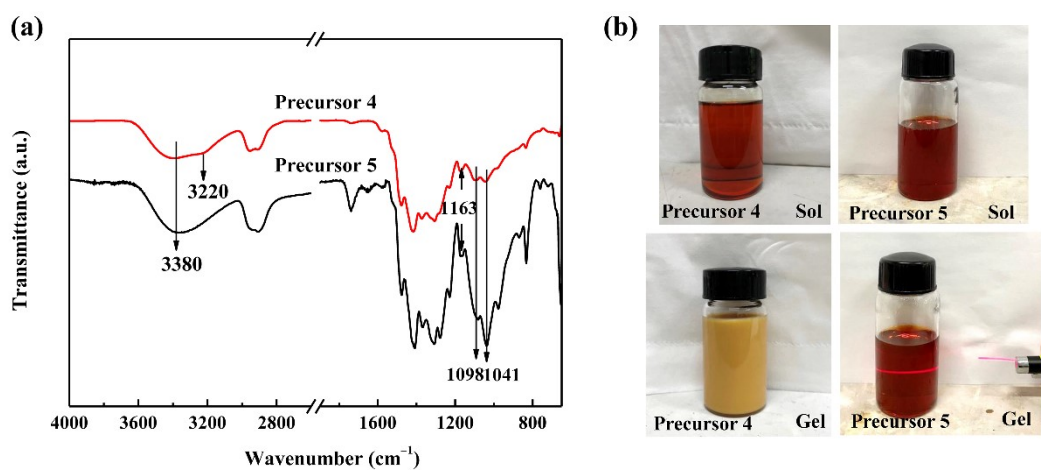

**Fig. S3** (a) FTIR spectra of Precursors 4 and 5; (b) Images of the sol and gel obtained from Precursors 4 and 5, respectively. Gel of Precursor 5 shows Tyndall effect in (b).

**Table S2** Calculated phase compositions in  $ZrB_2$  powders based on RIR method

| Phase weight fraction<br>(wt.%) | Phase weight fraction      |                            |                  |
|---------------------------------|----------------------------|----------------------------|------------------|
|                                 | <i>m</i> -ZrO <sub>2</sub> | <i>t</i> -ZrO <sub>2</sub> | ZrB <sub>2</sub> |
| Precursor 1                     | 6.2%                       | 0.8%                       | 92.9%            |
| Precursor 2                     | 5.8%                       | 0.4%                       | 93.7%            |

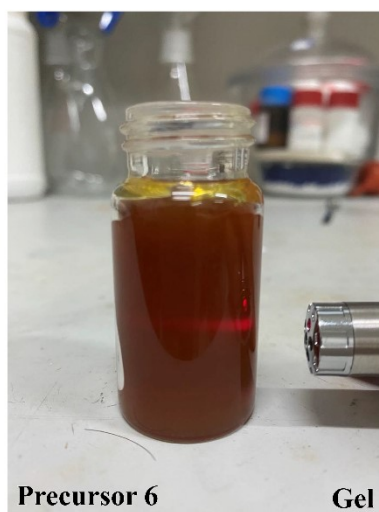

**Fig. S4** Image of the gel obtained from Precursor 6 with Tyndall effect.

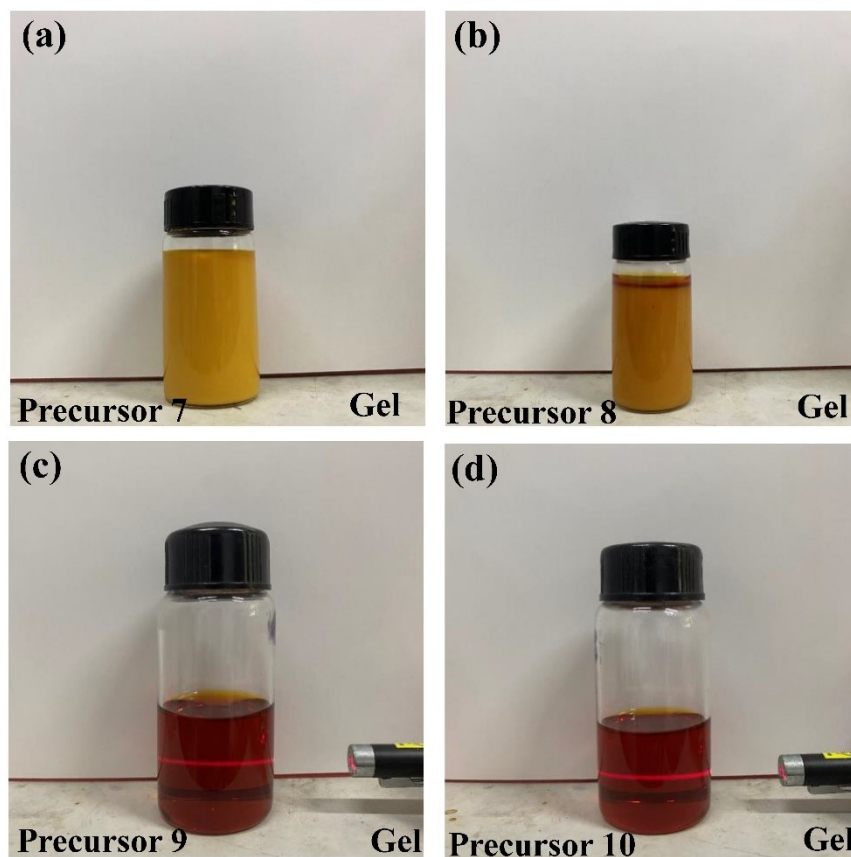

**Fig. S5** Images of gels obtained from (a) Precursor 7, (b) Precursor 8, (c) Precursor 9, (d) Precursor 10. (c) and (d) shows the Tyndall effect.

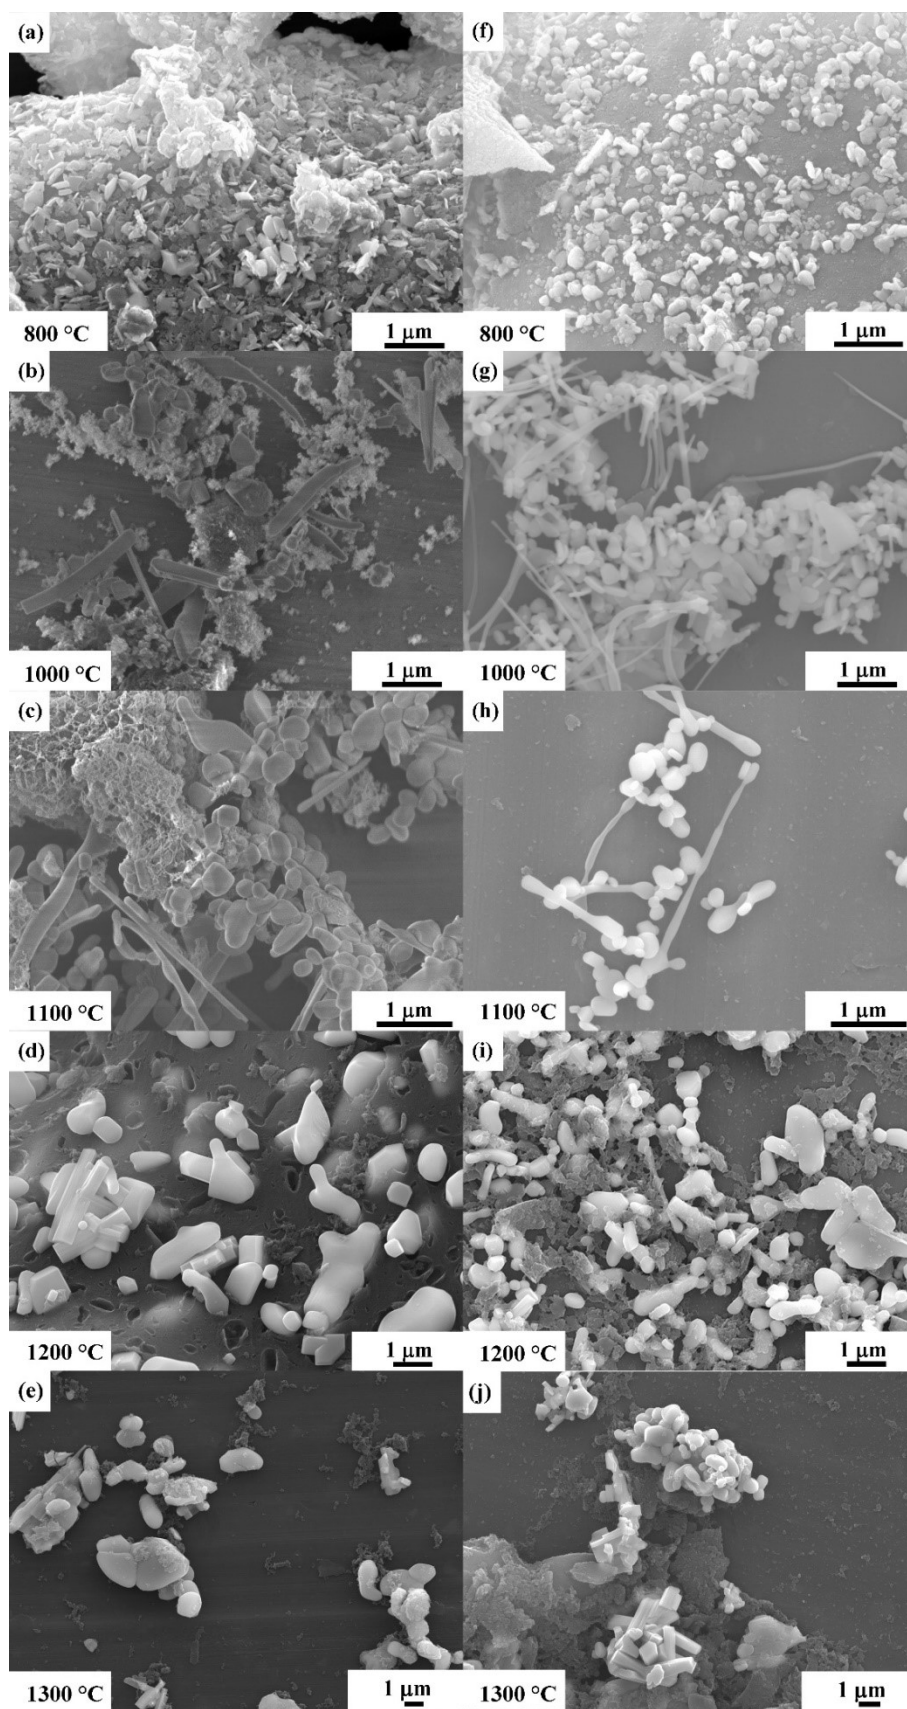

**Fig. S6** SEM images of  $\text{ZrO}_2$  particles obtained from precursors after calcinated for 1 h at

different temperatures: (a-e) Precursor 4, (f-j) Precursor 5.
